# Supplementary material
Source: publisher site journal article supplement (https://www.dovepress.com/article/558098)
Supplement: Supplementary file 1 [file 558098_Supplementary%20File%201%20&%202.docx]

**eAppendix 1** Search Strategy

**Sources:**

After discussion with fellow MD colleague (E.H) and MD supervisor (T.J & A.B), we identified essential databases. We agreed upon PubMed & Medline, Embase, CINAHL and Web of Science. These databases were chosen as they contained qualitative research involving adult patients, ophthalmologists and nurses.

**Search Strategy:**

The search strategy was discussed with the MD team and constructed in agreement with the university medical faculty librarian (S.B), who specialises in search methods for systematic reviews. We searched each listed database and facilitated the databases’ own vocabulary and search builder specificities by considering an adapted list of search terms.

**Keywords and Search Terms:**

The two main concepts pre-specified for our search were “qualitative research” as a type of study design and “intravitreal injections” as the intervention. We conducted a rapid search of the literature on Google to identify relevant articles and recognise attached keywords and search terms that we could use as our own. We also modelled our equations on the search strategy in Gisselbaek's paper to thoroughly explore the concept of qualitative research. We screened the thesaurus of PubMed & Medline, Embase, CINAHL and Web of Science to find interchangeable keywords useful to our study. For each concept, and in each database (with the exception of Web of Science), we included controlled and free vocabulary to build an exhaustive list of studies before refinement to find more relevant results. We excluded several concepts:

1. Intravitreal implants; we did not intend to study
2. Studies conducted outside of the clinical setting; simulation studies, educational studies
3. Reports of unoriginal research; protocols, editorials
4. Animal studies
5. Paediatric population

**Eligibility Criteria:**

Publications were eligible for inclusion if all four of the following criteria were met:

- The primary focus is intravitreal injections in the field of ophthalmology (excluding intravitreal implants).
- The publication presents original qualitative data (including mixed method studies, excluding simulation studies, educational studies, protocols and editorials)
- The publication is written or translated into English.
- The study was published onwards from January 2000

As our objective was to assess the current state of the qualitative research in ophthalmology pertaining to intravitreal injections, articles published before 2000 were not relevant and included. We limited our search to papers written or translated in English.

***PubMed***:

**Specificities**:

MeSH terms were found for each concept and were particularly limited regarding the concept of “qualitative research”. We had to expand with exhaustive free vocabulary with the assistance of medical faculty librarian (S.B). The keyword “intravitreal injections” was open to both the title and abstract for a wider reach of studies.

**Equation**:

(anti-VEGF[tiab] OR intravitreal[tiab] OR intra-vitreal[tiab] OR "Intravitreal Injections"[Mesh]) AND ((((“semi-structured”[TIAB] OR semistructured[TIAB] OR unstructured[TIAB] OR informal[TIAB] OR “in-depth”[TIAB] OR indepth[TIAB] OR “face-to-face”[TIAB] OR structured[TIAB] OR guide[TIAB] OR guides[TIAB]) AND (interview*[TIAB] OR discussion*[TIAB] OR questionnaire*[TIAB])) OR (“focus group”[TIAB] OR “focus groups”[TIAB] OR qualitative[TIAB] OR ethnograph*[TIAB] OR fieldwork[TIAB] OR “field work”[TIAB] OR “key informant”[TIAB])) OR “interviews as topic”[Mesh] OR “focus groups”[Mesh] OR narration[Mesh] OR qualitative research[Mesh] OR "personal narratives as topic"[Mesh])

*05.07.2024, 214 results*

**Vocabulary (controlled, free)**:

| **Keywords** | **MeSH Terms** | **Free Vocabulary** |
| --- | --- | --- |
| **Intravitreal injections** | “Intravitreal Injections” | Anti-VEGF,  Intravitreal,  Intra-vitreal |
| **Qualitative research** | “Interviews as topic”, “Focus Groups”, Narration, Qualitative Research, “Personal narratives as topic” | “Semi-structured”, Semistructured, Unstructured, Informal, “In-depth”, Indepth, “Face-to-face”, Structured, Guide, Guides, Interview*, Discussion*, Questionnaire*, “Focus group”, “Focus groups”, Qualitative, Ethnograph*, Fieldwork, “Field work”, “Key informant” |

***Embase***:

**Specificities**:

Emtree is the thesaurus of Embase. The keyword “intravitreal injections” was open to both the title and abstract for a wider reach of studies.

**Equation**:

(anti-VEGF:ti,ab OR intravitreal:ti,ab OR intra-vitreal:ti,ab OR 'Intravitreal drug administration'/exp) AND (((("semi-structured" OR semistructured OR unstructured OR informal OR "in-depth" OR indepth OR "face-to-face" OR structured OR guide) adj3 (interview* OR discussion* OR questionnaire*))):ti,ab OR focus group*:ti,ab,kw  OR qualitative:ti,ab,kw  OR ethnograph*:ti,ab,kw  OR fieldwork:ti,ab,kw  OR "field work":ti,ab,kw  OR "key informant":ti,ab,kw OR 'qualitative research'/exp)

*05.07.2024, 350 results*

**Vocabulary (controlled, free)**:

| **Keywords** | **Emtree Terms** | **Free Vocabulary** |
| --- | --- | --- |
| **Intravitreal injections** | “Intravitreal Drug Administration” | Anti-VEGF, Intravitreal, Intra-vitreal |
| **Qualitative research** | “Qualitative research” | "Semi-structured", Semistructured, Unstructured, Informal, "In-depth", Indepth, "Face-to-face", Structured, Guide), Interview*, Discussion*, Questionnaire*, Focus Group*, Qualitative, Ethnograph*, Fieldwork, "Field work", "Key informant" |

***CINAHL***:

**Specificities**:

With CINAHL being a prominent nursing database, medical faculty librarian (S.B) adapted our search strategy and designed equations with appropriate vocabulary (CINAHL headings). CINAHL is not made to do research with very complicated equations. Hence, we included more free vocabulary than controlled in this database.

**Equation**:

((TI anti-VEGF OR AB anti-VEGF) OR (TI intravitreal OR AB intravitreal) OR (TI intra-vitreal OR AB intra-vitreal) OR (MH "Injections, Intravitreal+")) AND ((MH "Qualitative Studies+") OR (MH "Interviews+") OR TI (qualitative OR interview* OR themes OR "mixed method" OR "mixed methods" ) OR AB (qualitative OR interview* OR themes OR "mixed method" OR "mixed methods" ))

*05.07.2024, 34 results*

**Vocabulary (controlled, free)**:

| **Keywords** | **CINAHL (sub)headings** | **Free Vocabulary** |
| --- | --- | --- |
| **Intravitreal injections** | "Injections, Intravitreal" | Anti-VEGF, Anti-VEGF, Intravitreal, Intra-vitreal |
| **Qualitative research** | "Qualitative Studies”, "Interviews” | Qualitative, Interview*, Themes, "Mixed method", "Mixed methods" |

***Web of Science***:

**Specificities**:

Web of Science is unique in that its core collection employs no controlled vocabulary or thesaurus in assigning subject terms. Instead, natural language indexing (where every word in the title is searchable) is used. To ensure a wide reach of studies are screened, keywords were searched in both the title and abstract.

**Equation**:

((TI=anti-VEGF OR AB=anti-VEGF) OR (TI=intravitreal OR AB=intravitreal) OR (TI=intra-vitreal OR AB=intra-vitreal) OR TI="Intravitreal Injections") AND (((((TI=semi-structured OR AB=semi-structured) OR (TI=semistructured OR AB=semistructured) OR (TI=unstructured OR AB=unstructured) OR (TI=informal OR AB=informal) OR (TI=in-depth OR AB=in-depth) OR (TI=indepth OR AB=indepth) OR (TI=face-to-face OR AB=face-to-face) OR (TI=structured OR AB=structured) OR (TI=guide OR AB=guide) OR (TI=guides OR AB=guides)) AND ((TI=interview* OR AB=interview*) OR (TI=discussion* OR AB=discussion*) OR (TI=questionnaire* OR AB=questionnaire*))) OR ((TI="focus group" OR AB="focus group") OR (TI="focus groups" OR AB="focus groups") OR (TI=qualitative OR AB=qualitative) OR (TI=ethnograph* OR AB=ethnograph*) OR (TI=fieldwork OR AB=fieldwork) OR (TI="field work" OR AB="field work") OR (TI="key informant" OR AB="key informant"))) OR TI="interviews as topic" OR TI="focus groups" OR TI=narration OR TI="qualitative research" OR TI="personal narratives as topic")

*23.08.2024, 197 results*

**Vocabulary (free)**:

| **Keywords** | **Free Vocabulary** |
| --- | --- |
| **Intravitreal injections** | Anti-VEGF, Intravitreal, Intra-vitreal, "Intravitreal Injections” |
| **Qualitative research** | Semi-structured, Semistructured, Unstructured, Informal, In-depth, Indepth, Face-to-face, Structured, Guide, Guides, Interview*, Discussion*, Questionnaire*, “Focus group", Focus groups", Qualitative, Ethnograph, Fieldwork, "Field work, "Key informant", "Interviews as topic", narration, "qualitative research", "personal narratives as topic" |

**eAppendix 2** Extraction categories

1. Publication Characteristics
2. Authors
3. Title of Publication
4. Country of Publication
5. Australia
6. UK
7. United States
8. Other
9. Year of Publication
10. Journal Type:
    1. Focus
    2. Medical
    3. Nursing
    4. Public health
    5. Other
11. Main topic of research and general objective
12. Patient Safety
13. Barriers to Best Care
14. Professional Role
15. Non-technical Skills
16. Training and Knowledge in Practice
17. Interprofessional Communication
18. Transfer of Information
19. Experiences of Care
20. Patient’s Experiences of Intravitreal Injections
21. Ophthalmologist’s Experiences of Intravitreal Injections
22. Caregiver’s Experiences of Intravitreal Injections
23. Implementation of Changes in Clinical Practice
24. Patients/Healthcare Professionals’ Interaction
25. Work Environment
26. Research Team Characteristics
27. Researchers
28. Single Researcher
29. Uniprofessional Team
30. Multi-Professional Team
31. Ophthalmologist Specialist Included (y/n)
32. Other than classical HC Practitioner Included?
33. Nurse
34. Participant characteristics
    1. Number of Participants
    2. Adult patient’s condition
       1. Neovascular age-related macular degeneration
       2. Diabetic retinopathy
       3. Retinal vein occlusion
       4. Other
35. Type of study
    1. QR only
    2. Mixed methods?
36. Theoretical framework
    1. Phenomenology
    2. Ethnography
    3. Grounded theory
    4. Other
    5. Not specified
37. Data collection methods
38. Mixed methods
39. Semi-structured interviews
40. In-depth interviews
41. Observations
42. Document reviews
43. Focus group
44. Others
45. Data analysis methods
46. Thematic analysis
47. Content analysis
48. Grounded theory
49. Template analysis
50. Framework analysis
51. Discourse analysis
52. Narrative analysis
53. Qualitative description
54. Others
55. Research quality criteria
56. Reflexivity
57. Including study limitations or subjectivity (y/n)
58. Presentation of evidence to support analysis claims
59. Including verbatim quotations (y/n)
60. Including ethical considerations (y/n)
